# Supplementary material for: Assessing Transferability of Remote Sensing Pasture Estimates Using Multiple Machine Learning Algorithms and Evaluation Structures
Source: MDPI journal article supplement (doi:10.3390/rs15112940), 2023-06-05
Supplement: s1 [file s1]

Table S1. Complete AGB model evaluations including tuned hyperparameters.

| Train/eval structure                                      | Feature set              | Algorithm | Parameters                                                   | Parameter values | Train R <sup>2</sup> | Train RMSE | Test R <sup>2</sup> | Test RMSE |
|-----------------------------------------------------------|--------------------------|-----------|--------------------------------------------------------------|------------------|----------------------|------------|---------------------|-----------|
| nested CV: outer random 10-fold, inner random 5-fold      | Spectral bands + indices | SVR       | C, gamma                                                     | 1931, 0.07       | 0.87                 | 465        | 0.72                | 679       |
|                                                           |                          | RF        | max_depth, min_samples_leaf, min_samples_split, n_estimators | 90, 1, 2, 100    | 1.00                 | 73         | 0.71                | 683       |
|                                                           |                          | PCA       | n_components                                                 | 13               | 0.68                 | 717        | 0.63                | 769       |
|                                                           |                          | PLSR      | n_components                                                 | 11               | 0.68                 | 716        | 0.64                | 760       |
|                                                           |                          | XGB       | learning_rate, max_depth, min_child_weight, n_estimators     | 0.05, 3, 10, 800 | 1.00                 | 58         | 0.69                | 704       |
|                                                           |                          | LASSO     | mean alpha                                                   | 2.3              | 0.68                 | 715        | 0.65                | 759       |
| nested CV: outer LOGO by plot, inner 5-fold group by plot | Spectral bands + indices | SVR       | C, gamma                                                     | 10000, 0.07      | 0.90                 | 405        | 0.73                | 656       |
|                                                           |                          | RF        | max_depth, min_samples_leaf, min_samples_split, n_estimators | 30, 1, 2, 400    | 1.00                 | 56         | 0.69                | 710       |
|                                                           |                          | PCA       | n_components                                                 | 13               | 0.68                 | 718        | 0.63                | 776       |
|                                                           |                          | PLSR      | n_components                                                 | 9                | 0.68                 | 717        | 0.63                | 774       |
|                                                           |                          | XGB       | learning_rate, max_depth, min_child_weight, n_estimators     | 0.2, 3, 1, 100   | 0.99                 | 92         | 0.66                | 746       |
|                                                           |                          | LASSO     | mean alpha                                                   | 2.6              | 0.68                 | 718        | 0.64                | 769       |
| nested CV: outer LOGO by date, inner 5-fold group by date | Spectral bands + indices | SVR       | C, gamma                                                     | 10000, 0.003     | 0.68                 | 723        | 0.45                | 941       |
|                                                           |                          | RF        | max_depth, min_samples_leaf, min_samples_split, n_estimators | 90, 2, 5, 100    | 0.99                 | 109        | 0.48                | 916       |
|                                                           |                          | PCA       | n_components                                                 | 13               | 0.67                 | 727        | 0.60                | 800       |
|                                                           |                          | PLSR      | n_components                                                 | 8                | 0.68                 | 724        | 0.59                | 811       |
|                                                           |                          | XGB       | learning_rate, max_depth, min_child_weight, n_estimators     | 0.05, 3, 1, 100  | 0.98                 | 188        | 0.49                | 914       |
|                                                           |                          | LASSO     | mean alpha                                                   | 2.4              | 0.68                 | 716        | 0.58                | 825       |

|                                                      |                |       |                                                              |                  |      |     |      |      |
|------------------------------------------------------|----------------|-------|--------------------------------------------------------------|------------------|------|-----|------|------|
| holdout set: Train BRU 3-fold CV by plot, Test NFREC | Spectral bands | SVR   | C, gamma                                                     | 1931, 0.07       | 0.75 | 680 | 0.25 | 937  |
|                                                      |                | RF    | max_depth, min_samples_leaf, min_samples_split, n_estimators | 30, 1, 2, 200    | 1.00 | 0   | 0.05 | 1050 |
|                                                      |                | PCA   | n_components                                                 | 7                | 0.63 | 820 | 0.28 | 915  |
|                                                      |                | PLSR  | n_components                                                 | 6                | 0.65 | 799 | 0.31 | 900  |
|                                                      |                | XGB   | learning_rate, max_depth, min_child_weight, n_estimators     | 0.05, 3, 10, 100 | 0.89 | 449 | 0.02 | 1069 |
|                                                      |                | LASSO | mean alpha                                                   | 1.5              | 0.66 | 791 | 0.27 | 923  |

Table S2. Complete %N model evaluations including tuned hyperparameters.

| Train/eval structure                                             | Feature set              | Algorithm | Parameters                                                   | Parameter values | Train R <sup>2</sup> | Train RMSE | Test R <sup>2</sup> | Test RMSE |
|------------------------------------------------------------------|--------------------------|-----------|--------------------------------------------------------------|------------------|----------------------|------------|---------------------|-----------|
| nested CV: NFREC only - outer random 5-fold, inner random 3-fold | Spectral bands + indices | SVR       | C, gamma                                                     | 14, 0.014        | 0.80                 | 0.25       | 0.65                | 0.34      |
|                                                                  |                          | RF        | max_depth, min_samples_leaf, min_samples_split, n_estimators | 30, 1, 2, 100    | 0.99                 | 0.05       | 0.57                | 0.37      |
|                                                                  |                          | PCA       | n_components                                                 | 10               | 0.74                 | 0.29       | 0.66                | 0.33      |
|                                                                  |                          | PLSR      | n_components                                                 | 12               | 0.75                 | 0.29       | 0.64                | 0.34      |
|                                                                  |                          | XGB       | learning_rate, max_depth, min_child_weight, n_estimators     | 0.05, 6, 10, 100 | 0.97                 | 0.1        | 0.50                | 0.40      |
|                                                                  |                          | LASSO     | mean alpha                                                   | 0.001            | 0.75                 | 0.29       | 0.65                | 0.34      |
|                                                                  |                          | SVR       | C, gamma                                                     | 72, 0.014        | 0.82                 | 0.24       | 0.70                | 0.31      |

|                                                                               |                                |       |                                                                 |                    |      |      |       |      |
|-------------------------------------------------------------------------------|--------------------------------|-------|-----------------------------------------------------------------|--------------------|------|------|-------|------|
| nested CV: NFREC only -<br>outer LOGO by plot, inner 3-<br>fold group by plot | Spectral<br>bands +<br>indices | RF    | max_depth, min_samples_leaf,<br>min_samples_split, n_estimators | 30, 1, 2, 200      | 1.00 | 0.04 | 0.55  | 0.38 |
|                                                                               |                                | PCA   | n_components                                                    | 11                 | 0.74 | 0.29 | 0.65  | 0.34 |
|                                                                               |                                | PLSR  | n_components                                                    | 9                  | 0.75 | 0.29 | 0.66  | 0.33 |
|                                                                               |                                | XGB   | learning_rate, max_depth,<br>min_child_weight, n_estimators     | 0.05, 6, 1,<br>800 | 1.00 | 0.01 | 0.52  | 0.40 |
|                                                                               |                                | LASSO | mean alpha                                                      | 0.0005             | 0.75 | 0.29 | 0.66  | 0.33 |
| nested CV: NFREC only -<br>outer LOGO by date, inner<br>3-fold group by date  | Spectral<br>bands              | SVR   | C, gamma                                                        | 10000,<br>0.0001   | 0.72 | 0.30 | 0.55  | 0.38 |
|                                                                               |                                | RF    | max_depth, min_samples_leaf,<br>min_samples_split, n_estimators | 70, 1, 2, 100      | 0.99 | 0.05 | 0.20  | 0.51 |
|                                                                               |                                | PCA   | n_components                                                    | 8                  | 0.69 | 0.31 | 0.53  | 0.39 |
|                                                                               |                                | PLSR  | n_components                                                    | 7                  | 0.72 | 0.30 | 0.55  | 0.38 |
|                                                                               |                                | XGB   | learning_rate, max_depth,<br>min_child_weight, n_estimators     | 0.05, 3, 1,<br>400 | 0.97 | 0.10 | 0.25  | 0.49 |
|                                                                               |                                | LASSO | mean alpha                                                      | 0.001              | 0.72 | 0.30 | 0.60  | 0.36 |
| nested CV: NFREC only -<br>outer LOGO by year, inner 3-<br>fold group by plot | Spectral<br>bands              | SVR   | C, gamma                                                        | 373, 0.003         | 0.78 | 0.27 | 0.27  | 0.49 |
|                                                                               |                                | RF    | max_depth, min_samples_leaf,<br>min_samples_split, n_estimators | 30, 1, 2, 200      | 0.99 | 0.04 | -0.41 | 0.68 |
|                                                                               |                                | PCA   | n_components                                                    | 6                  | 0.75 | 0.29 | 0.28  | 0.48 |

|  |  |       |                                                             |                    |      |      |       |      |
|--|--|-------|-------------------------------------------------------------|--------------------|------|------|-------|------|
|  |  | PLSR  | n_components                                                | 5                  | 0.74 | 0.29 | 0.21  | 0.51 |
|  |  | XGB   | learning_rate, max_depth,<br>min_child_weight, n_estimators | 0.05, 3, 1,<br>100 | 0.95 | 0.13 | -0.41 | 0.68 |
|  |  | LASSO | mean alpha                                                  | 0.0013             | 0.74 | 0.29 | 0.36  | 0.46 |

Table S3. Parameter ranges for all algorithms

| Algorithm | Parameters        | Ranges                                                                                  |
|-----------|-------------------|-----------------------------------------------------------------------------------------|
| SVR       | C                 | 0.1, 0.51794747, 2.6826958, 13.89495494, 71.9685673, 372.75937203, 1930.69772888, 10000 |
|           | gamma             | 0.0001, 0.00051795, 0.0026827, 0.01389495, 0.07196857, 0.37275937, 1.93069773, 10       |
| RF        | max_depth         | 30, 70, 90                                                                              |
|           | min_samples_leaf  | 1, 2                                                                                    |
|           | min_samples_split | 2, 5                                                                                    |
|           | n_estimators      | 100, 200, 400, 800                                                                      |
| PCA       | n_components      | Length of features (10 or 20 if indices included)                                       |
| PLSR      | n_components      | Length of features (10 or 20 if indices included)                                       |
| XGB       | learning_rate     | 0.05, 0.1, 0.2                                                                          |
|           | max_depth         | 3, 6, 9                                                                                 |
|           | min_child_weight  | 1, 10, 100                                                                              |
|           | n_estimators      | 100, 400, 800                                                                           |
| LASSO     | alpha             | 100-n sequence determined by LassoCV function in scikit-learn library                   |
